# Supplementary material for: Extraction of CaFexMn1-xO3-δ Perovskite Reduction/Re-oxidation Thermodynamics via the CrossFit CEF Algorithm: A Thermochemical Energy Storage Application
Source: Research Square preprint supplement (doi:10.21203/rs.3.rs-8388360/v1), 2026-01-14
Supplement: Supplementary file 1 [file 25f54d2e96c9e4192197935d.docx]

**Extracting Metal Oxide Redox Thermodynamics from TGA Measurements Requires Moving Beyond the Linearized Van ‘t Hoff Approach**

Steven A. Wilson1, Ellen B. Stechel2, Christopher L. Muhich1,3*

1 Chemical Engineering, School for the Engineering of Matter, Transport, & Energy, Arizona State University, 551 E. Tyler Mall, Tempe Arizona, 85287, USA

2 ASU LightWorks® and School of Molecular Sciences, Arizona State University, PO Box 878204, Tempe Arizona, 85287-8204, USA

3 Materials Science & Engineering, School for the Engineering of Matter, Transport, & Energy, Arizona State University, 551 E. Tyler Mall, Tempe Arizona, 85287, USA

* Corresponding Author


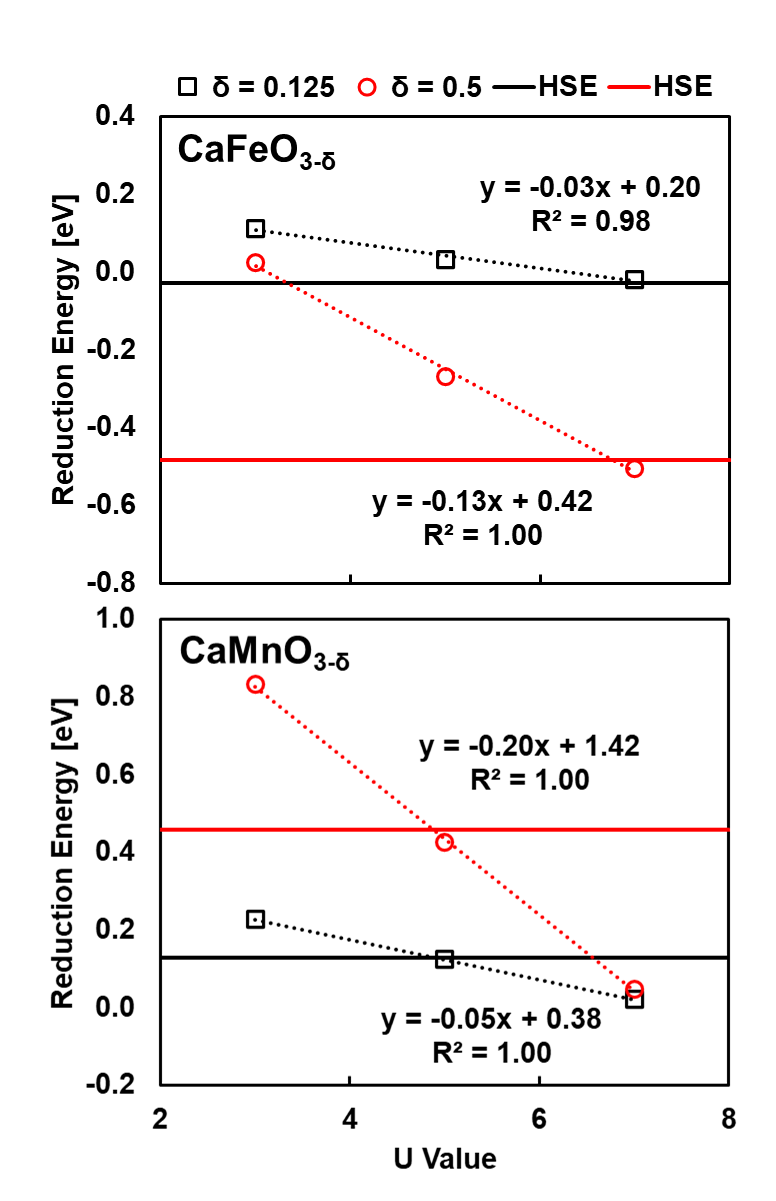


Figure S1: Calculated reduction energy versus Scan U value. Horizontal line is HSE reduction energy value at δ=0.125 (black) and δ=0.5 (red).


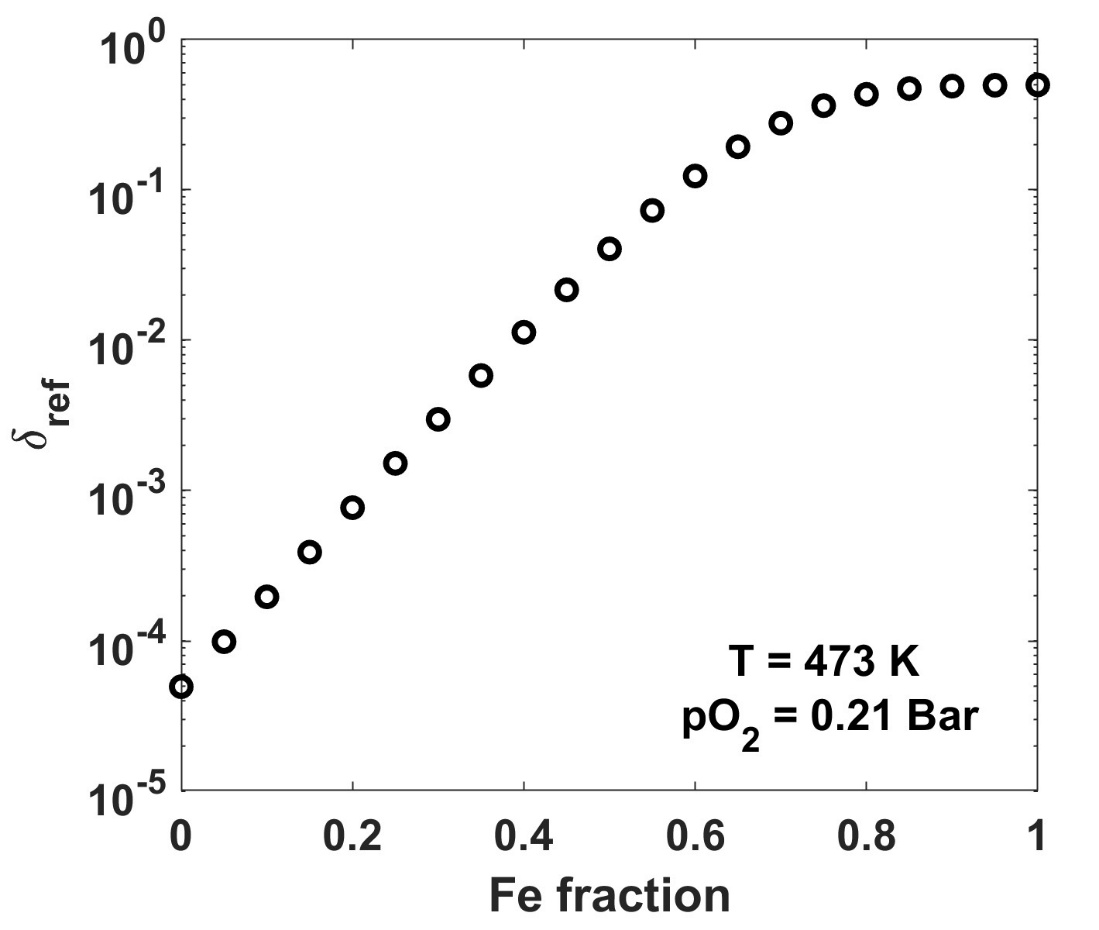

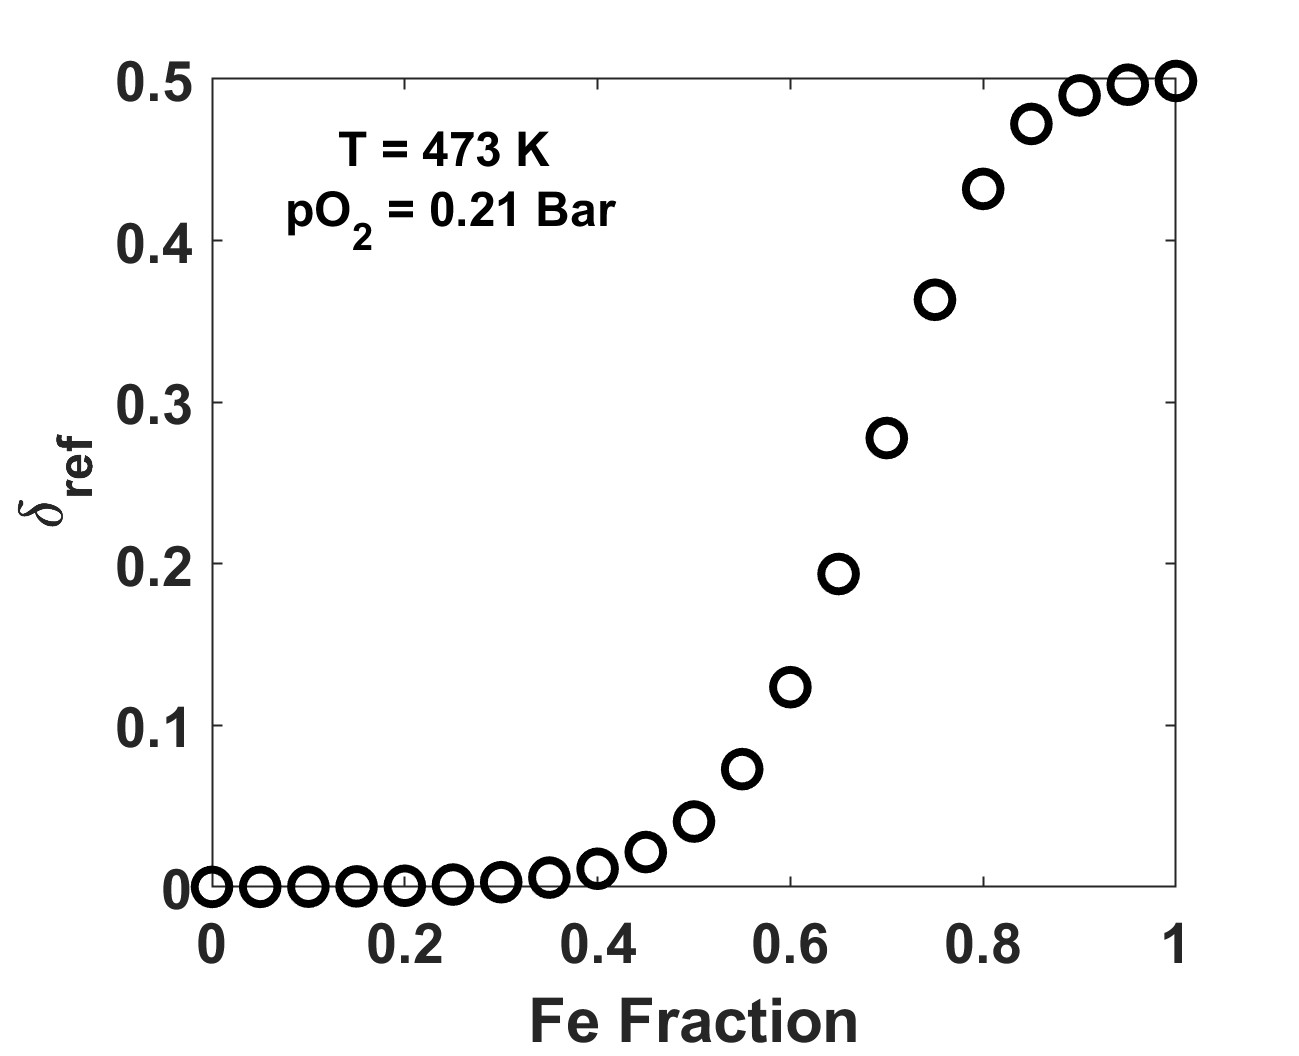


Figure S2: Predicted δ verusus Fe fraction in CFM at T=473 K and 0.21 Bar pO2.

Table S1: CF-CEF model parameters for CFM system

| Parameter | Value |
| --- | --- |
| A17 | -1.3575E-04 |
| A19 | 1.3504E-04 |
| A67 | 7.2948E-05 |
| Ho17 | 6.4497E-06 |
| Ho19 | 1.4895E-06 |
| Ho67 | 2.1794E-06 |
| So17 | 6.3224E-04 |
| So19 | 2.2816E-04 |
| So67 | 2.6235E-04 |
| GendA1 | 3.9042E-04 |
| GendA2 | -8.1888E-05 |
| GendHo1 | 3.1985E-05 |
| GendHo2 | 1.4107E-05 |
| GendSo1 | -2.8420E-03 |
| GendSo2 | -5.6829E-04 |


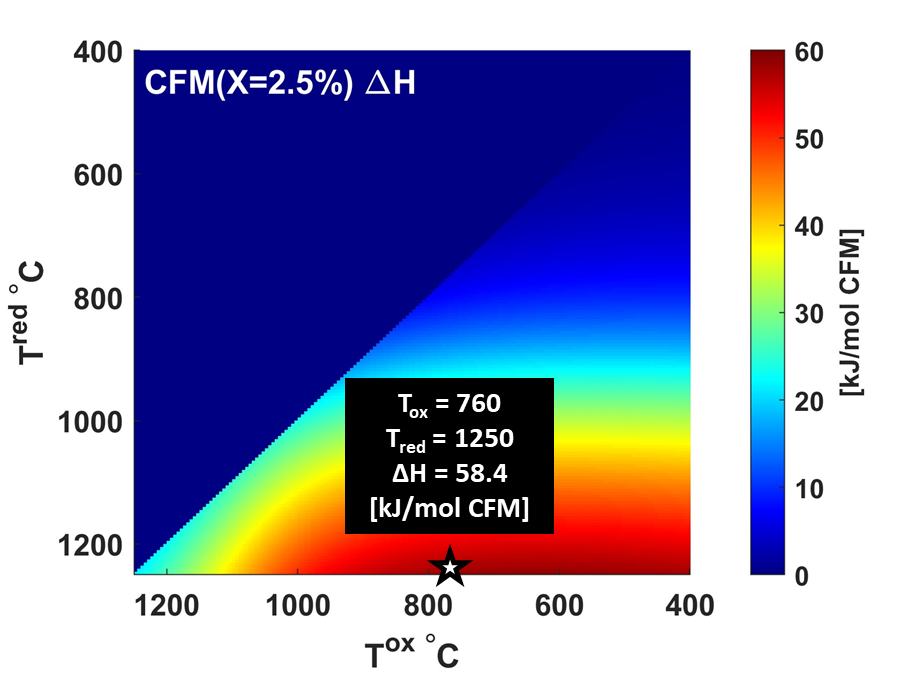


Figure S3: Thermochemical heat storage capacity of CFM x=0.025, Highlighted conditionas at Tox = 760 C at 0.21Bar pO2 and Tred = 1250 at 0.001 Bar pO2

The following is a summary of all the possible excess terms for CEF construction of up to a quinary material, A1-xA’xB1-yB’yO3-δ, with reduction only on the B sublattice:

The gamma functions that control the composition on each sublattice are:

Ya = 1-x

Yap = x

Ybr = 2δ(1-y)

Ybo = (1-2δ)(1-y)

Ybpr = 2δy

Ybpo = (1-2δ)y

Yo_o = 1-δ/3

Yo_Va = δ/3

The excess terms are described using the gamma functions above:

L1 = Yap*Ya*Ybr*Yo_o L2 = Yap*Ya*Ybr*Yo_o*(Ya - Yap)

L3 = Yap*Ya*Ybr*Yo_Va L4 = Yap*Ya*Ybr*Yo_Va*(Ya - Yap)

L5 = Yap*Ya*Ybo*Yo_o L6 = Yap*Ya*Ybo*Yo_o*(Ya - Yap)

L7 = Yap*Ya*Ybo*Yo_Va L8 = Yap*Ya*Ybo*Yo_Va*(Ya - Yap)

L9 = Yap*Ya*Ybpr*Yo_o L10 = Yap*Ya*Ybpr*Yo_o*(Ya - Yap)

L11 = Yap*Ya*Ybpr*Yo_Va L12 = Yap*Ya*Ybpr*Yo_Va*(Ya - Yap)

L13 = Yap*Ya*Ybpo*Yo_o L14 = Yap*Ya*Ybpo*Yo_o*(Ya - Yap)

L15 = Yap*Ya*Ybpo*Yo_Va L16 = Yap*Ya*Ybpo*Yo_Va*(Ya - Yap)

L17 = Ybr*Ybo*Ya*Yo_o L18 = Ybr*Ybo*Ya*Yo_o*(Ybr - Ybo)

L19 = Ybr*Ybo*Ya*Yo_Va L20 = Ybr*Ybo*Ya*Yo_Va*(Ybr - Ybo)

L21 = Ybr*Ybo*Yap*Yo_o L22 = Ybr*Ybo*Yap*Yo_o*(Ybr - Ybo)

L23 = Ybr*Ybo*Yap*Yo_Va L24 = Ybr*Ybo*Yap*Yo_Va*(Ybr - Ybo)

L25 = Ybpr*Ybpo*Ya*Yo_o L26 = Ybpr*Ybpo*Ya*Yo_o*(Ybpr - Ybpo)

L27 = Ybpr*Ybpo*Ya*Yo_Va L28 = Ybpr*Ybpo*Ya*Yo_Va*(Ybpr - Ybpo)

L29 = Ybpr*Ybpo*Yap*Yo_o L30 = Ybpr*Ybpo*Yap*Yo_o*(Ybpr - Ybpo)

L31 = Ybpr*Ybpo*Yap*Yo_Va L32 = Ybpr*Ybpo*Yap*Yo_Va*(Ybpr - Ybpo)

L33 = Ybpr*Ybr*Ya*Yo_o L34 = Ybpr*Ybr*Ya*Yo_o*(Ybr - Ybpr)

L35 = Ybpr*Ybr*Ya*Yo_Va L36 = Ybpr*Ybr*Ya*Yo_Va*(Ybr - Ybpr)

L37 = Ybpr*Ybr*Yap*Yo_o L38 = Ybpr*Ybr*Yap*Yo_o*(Ybr - Ybpr)

L39 = Ybpr*Ybr*Yap*Yo_Va L40 = Ybpr*Ybr*Yap*Yo_Va*(Ybr - Ybpr)

L41 = Ybpo*Ybr*Ya*Yo_o L42 = Ybpo*Ybr*Ya*Yo_o*(Ybr - Ybpo)

L43 = Ybpo*Ybr*Ya*Yo_Va L44 = Ybpo*Ybr*Ya*Yo_Va*(Ybr - Ybpo)

L45 = Ybpo*Ybr*Yap*Yo_o L46 = Ybpo*Ybr*Yap*Yo_o*(Ybr - Ybpo)

L47 = Ybpo*Ybr*Yap*Yo_Va L48 = Ybpo*Ybr*Yap*Yo_Va*(Ybr - Ybpo)

L49 = Ybpo*Ybo*Ya*Yo_o L50 = Ybpo*Ybo*Ya*Yo_o*(Ybo - Ybpo)

L51 = Ybpo*Ybo*Ya*Yo_Va L52 = Ybpo*Ybo*Ya*Yo_Va*(Ybo - Ybpo)

L53 = Ybpo*Ybo*Yap*Yo_o L54 = Ybpo*Ybo*Yap*Yo_o*(Ybo - Ybpo)

L55 = Ybpo*Ybo*Yap*Yo_Va L56 = Ybpo*Ybo*Yap*Yo_Va*(Ybo - Ybpo)

L57 = Ybpr*Ybo*Ya*Yo_o L58 = Ybpr*Ybo*Ya*Yo_o*(Ybpr - Ybo)

L59 = Ybpr*Ybo*Ya*Yo_Va L60 = Ybpr*Ybo*Ya*Yo_Va*(Ybpr - Ybo)

L61 = Ybpr*Ybo*Yap*Yo_o L62 = Ybpr*Ybo*Yap*Yo_o*(Ybpr - Ybo)

L63 = Ybpr*Ybo*Yap*Yo_Va L64 = Ybpr*Ybo*Yap*Yo_Va*(Ybpr - Ybo)

L65 = Yo_o*Yo_Va*Ya*Ybr L66 = Yo_o*Yo_Va*Ya*Ybr*(Yo_o - Yo_Va)

L67 = Yo_o*Yo_Va*Ya*Ybo L68 = Yo_o*Yo_Va*Ya*Ybo*(Yo_o - Yo_Va)

L69 = Yo_o*Yo_Va*Ya*Ybpr L70 = Yo_o*Yo_Va*Ya*Ybpr*(Yo_o - Yo_Va)

L71 = Yo_o*Yo_Va*Ya*Ybpo L72 = Yo_o*Yo_Va*Ya*Ybpo*(Yo_o - Yo_Va)

L73 = Yo_o*Yo_Va*Yap*Ybr L74 = Yo_o*Yo_Va*Yap*Ybr*(Yo_o - Yo_Va)

L75 = Yo_o*Yo_Va*Yap*Ybo L76 = Yo_o*Yo_Va*Yap*Ybo*(Yo_o - Yo_Va)

L77 = Yo_o*Yo_Va*Yap*Ybpr L78 = Yo_o*Yo_Va*Yap*Ybpr*(Yo_o - Yo_Va)

L79 = Yo_o*Yo_Va*Yap*Ybpo L80 = Yo_o*Yo_Va*Yap*Ybpo*(Yo_o - Yo_Va)
